# Supplementary material for: Cell states beyond transcriptomics: integrating structural organization and gene expression in hiPSC-derived cardiomyocytes
Source: bioRxiv or medRxiv preprint supplement (doi:10.1101/2020.05.26.081083), 2020-05-27

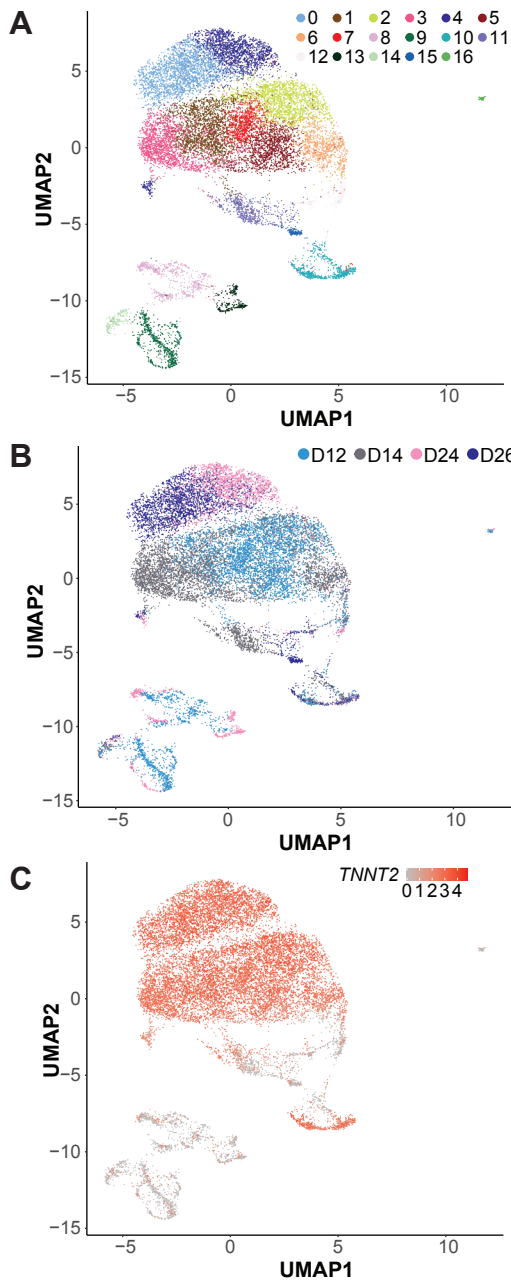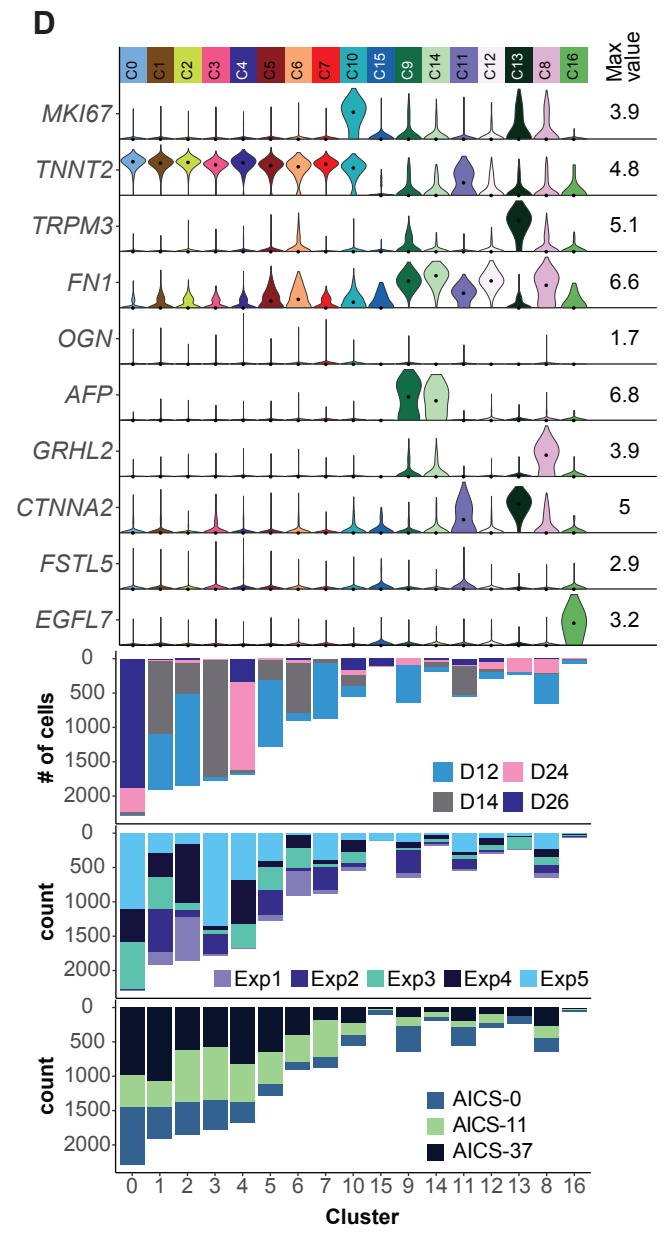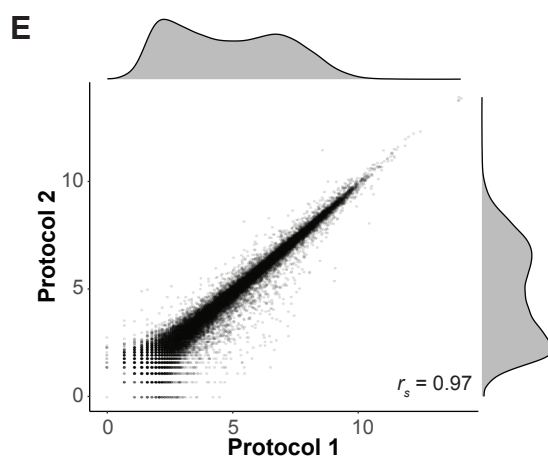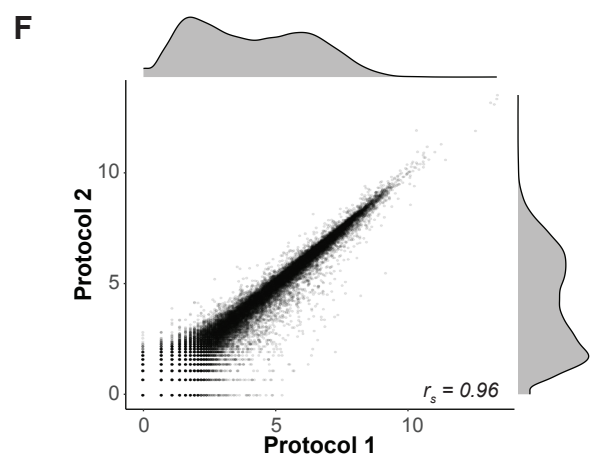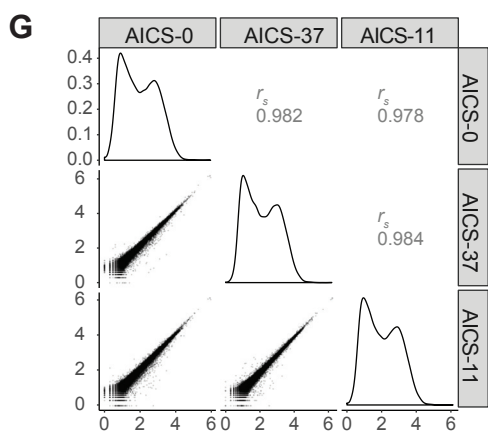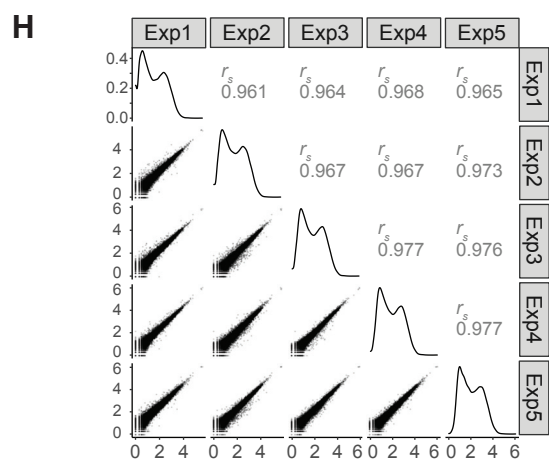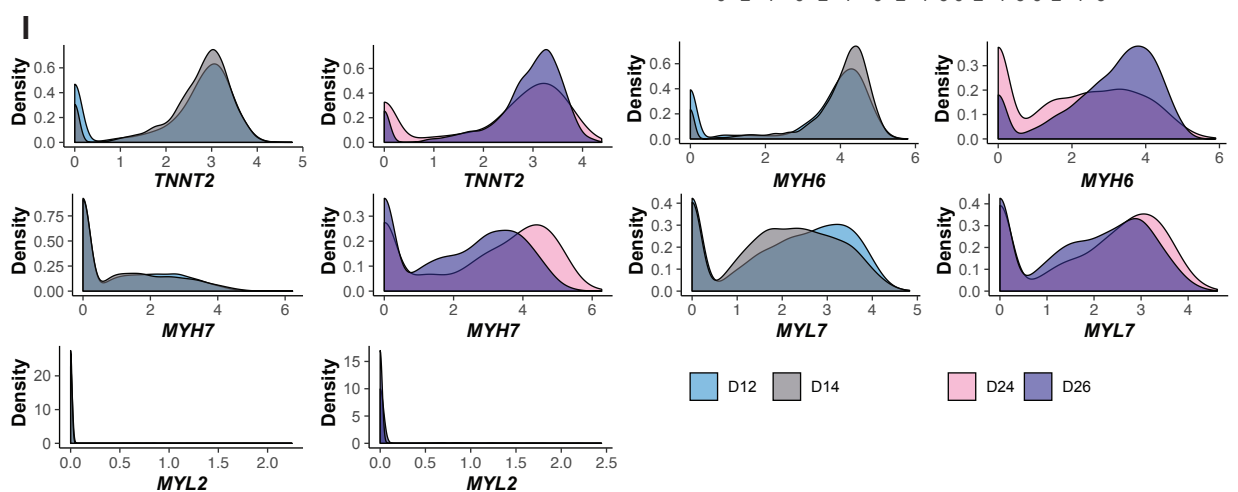

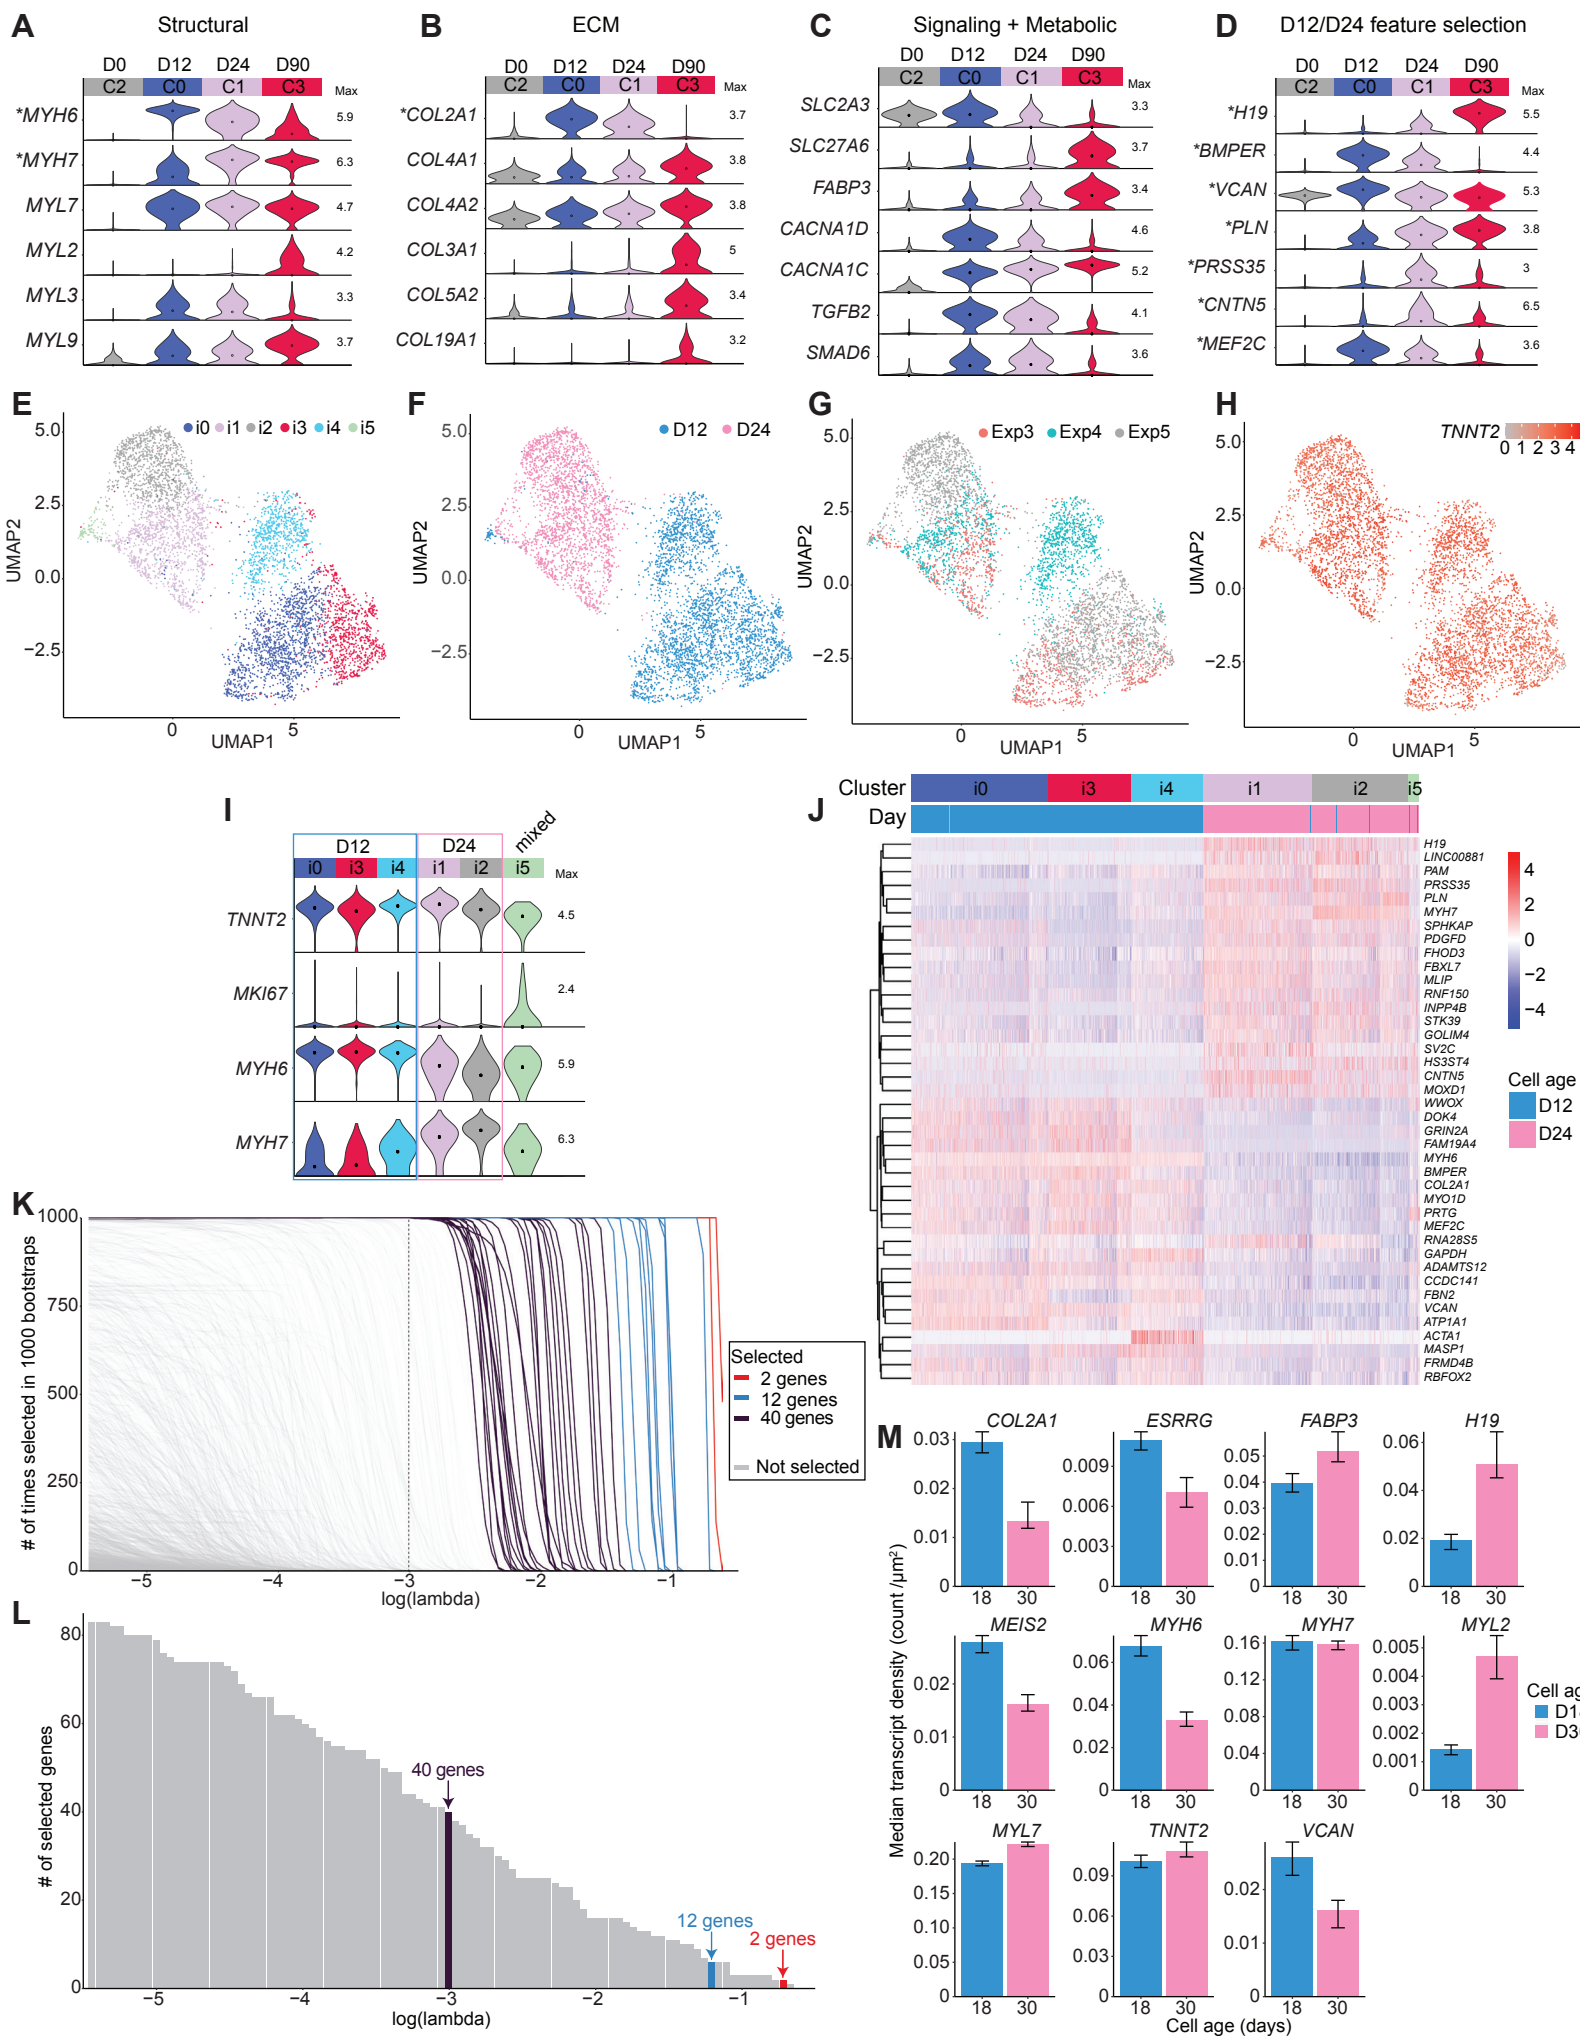



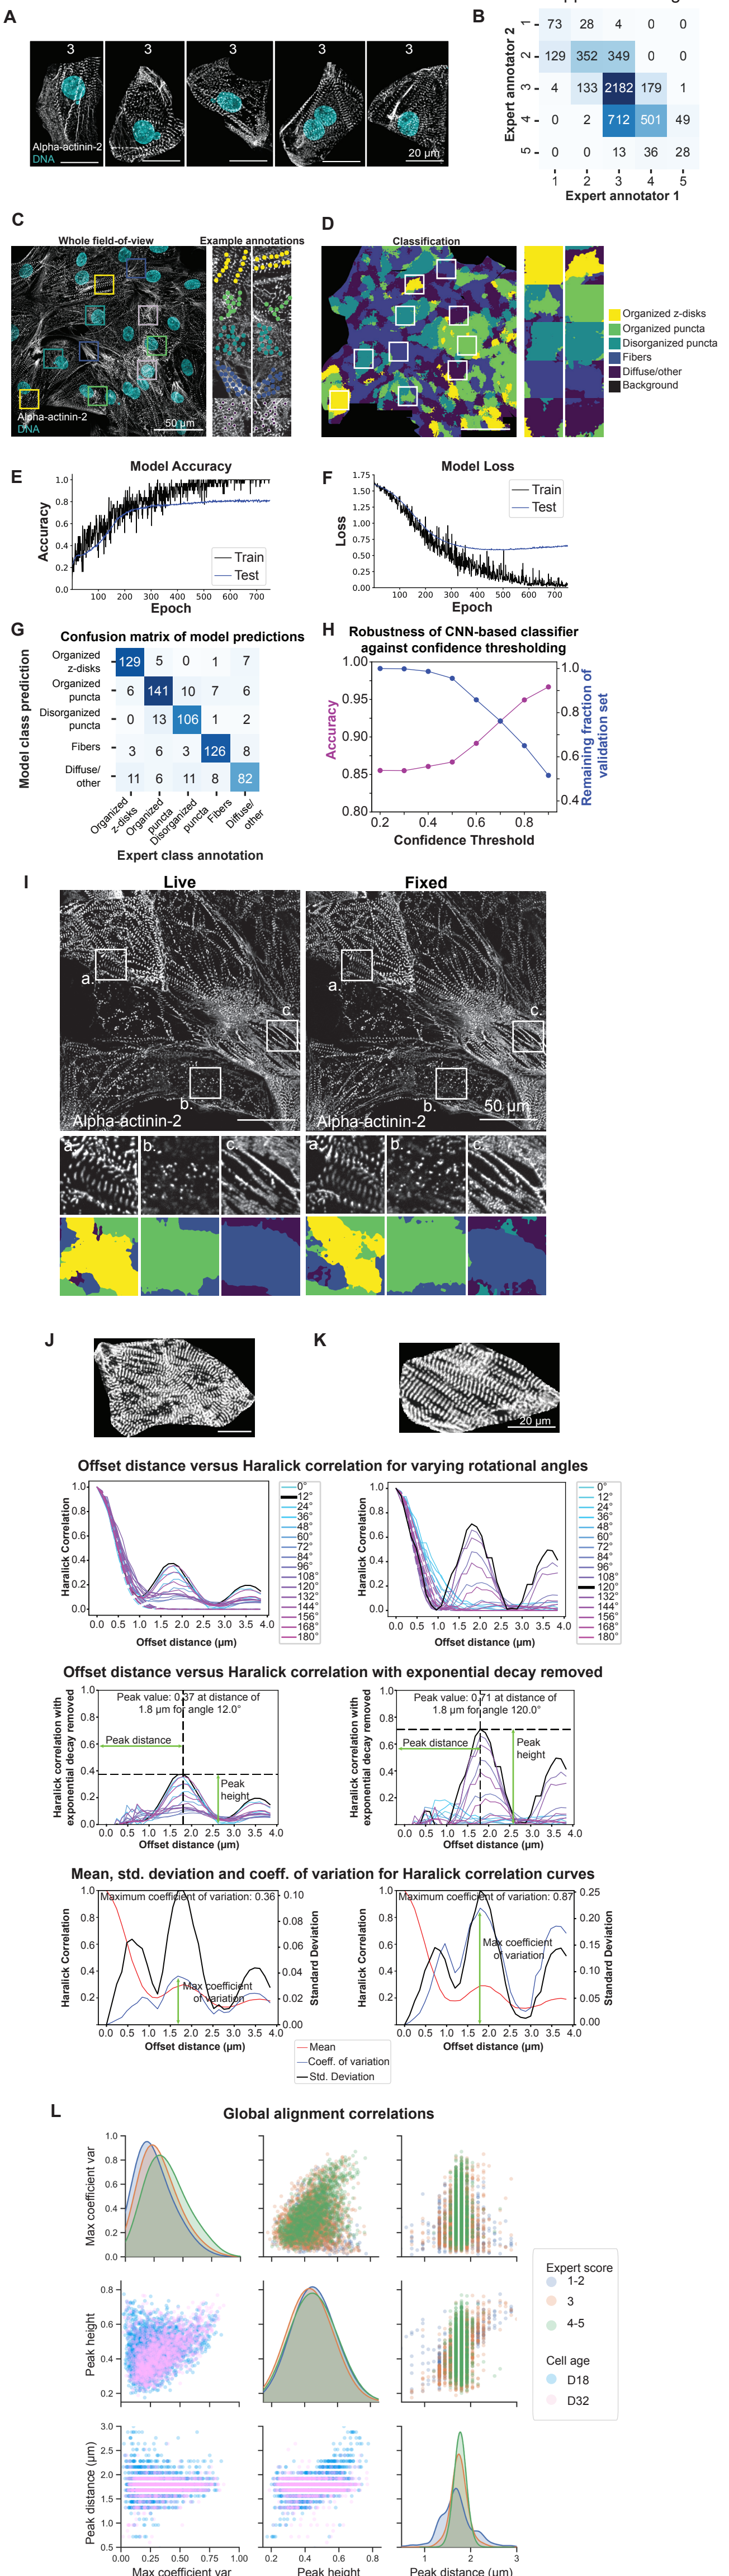

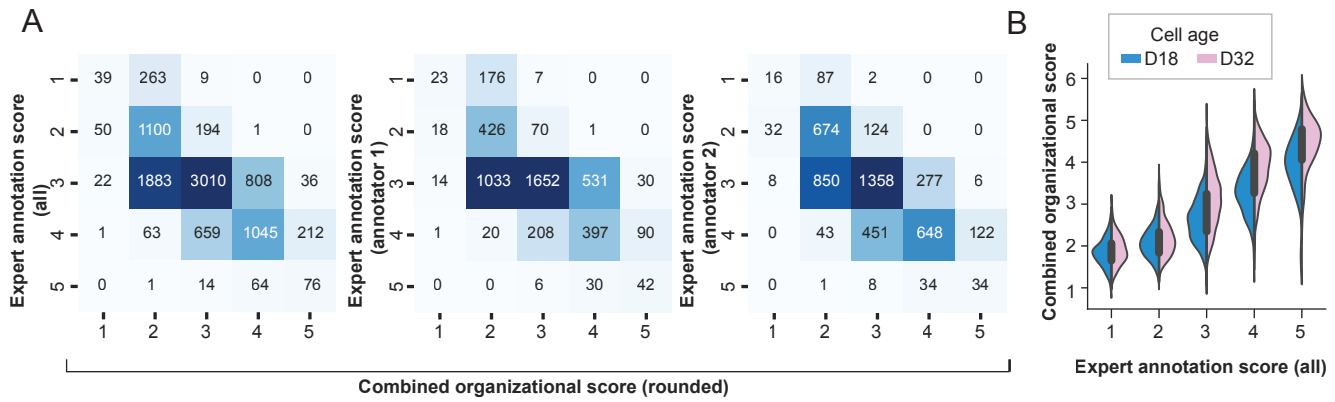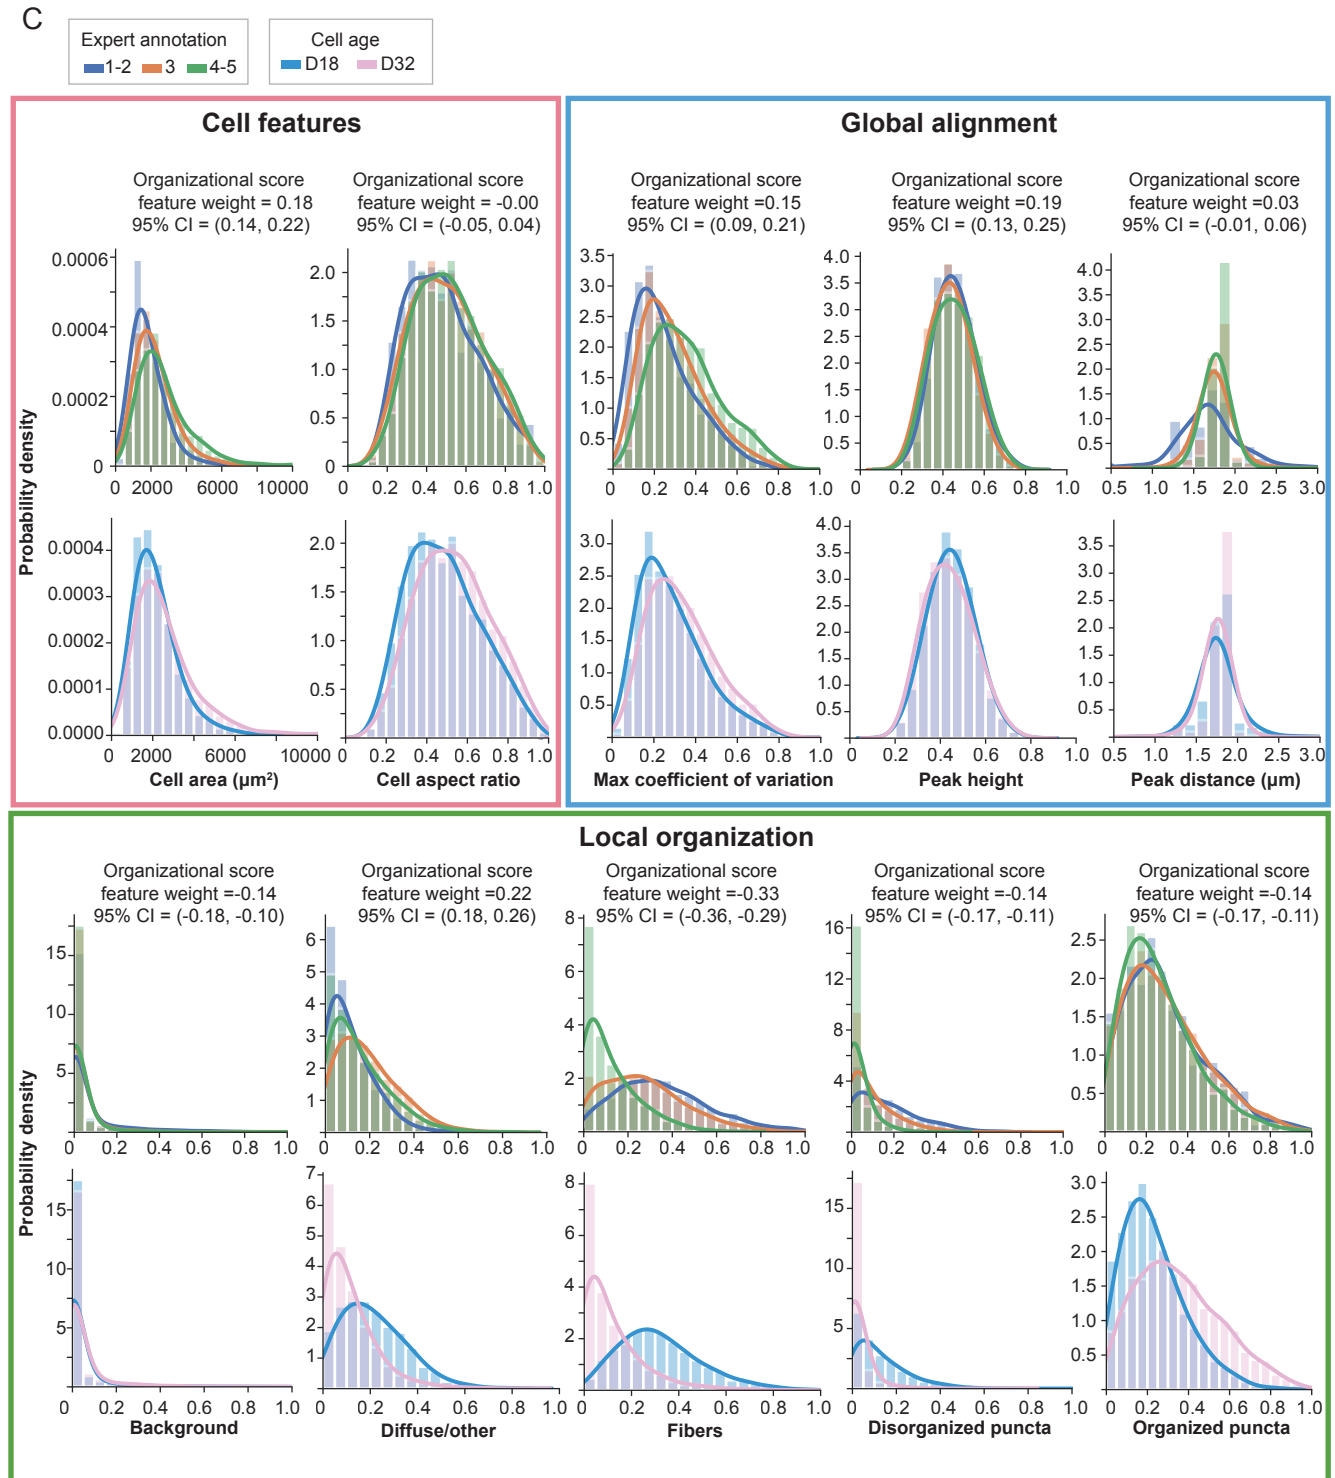



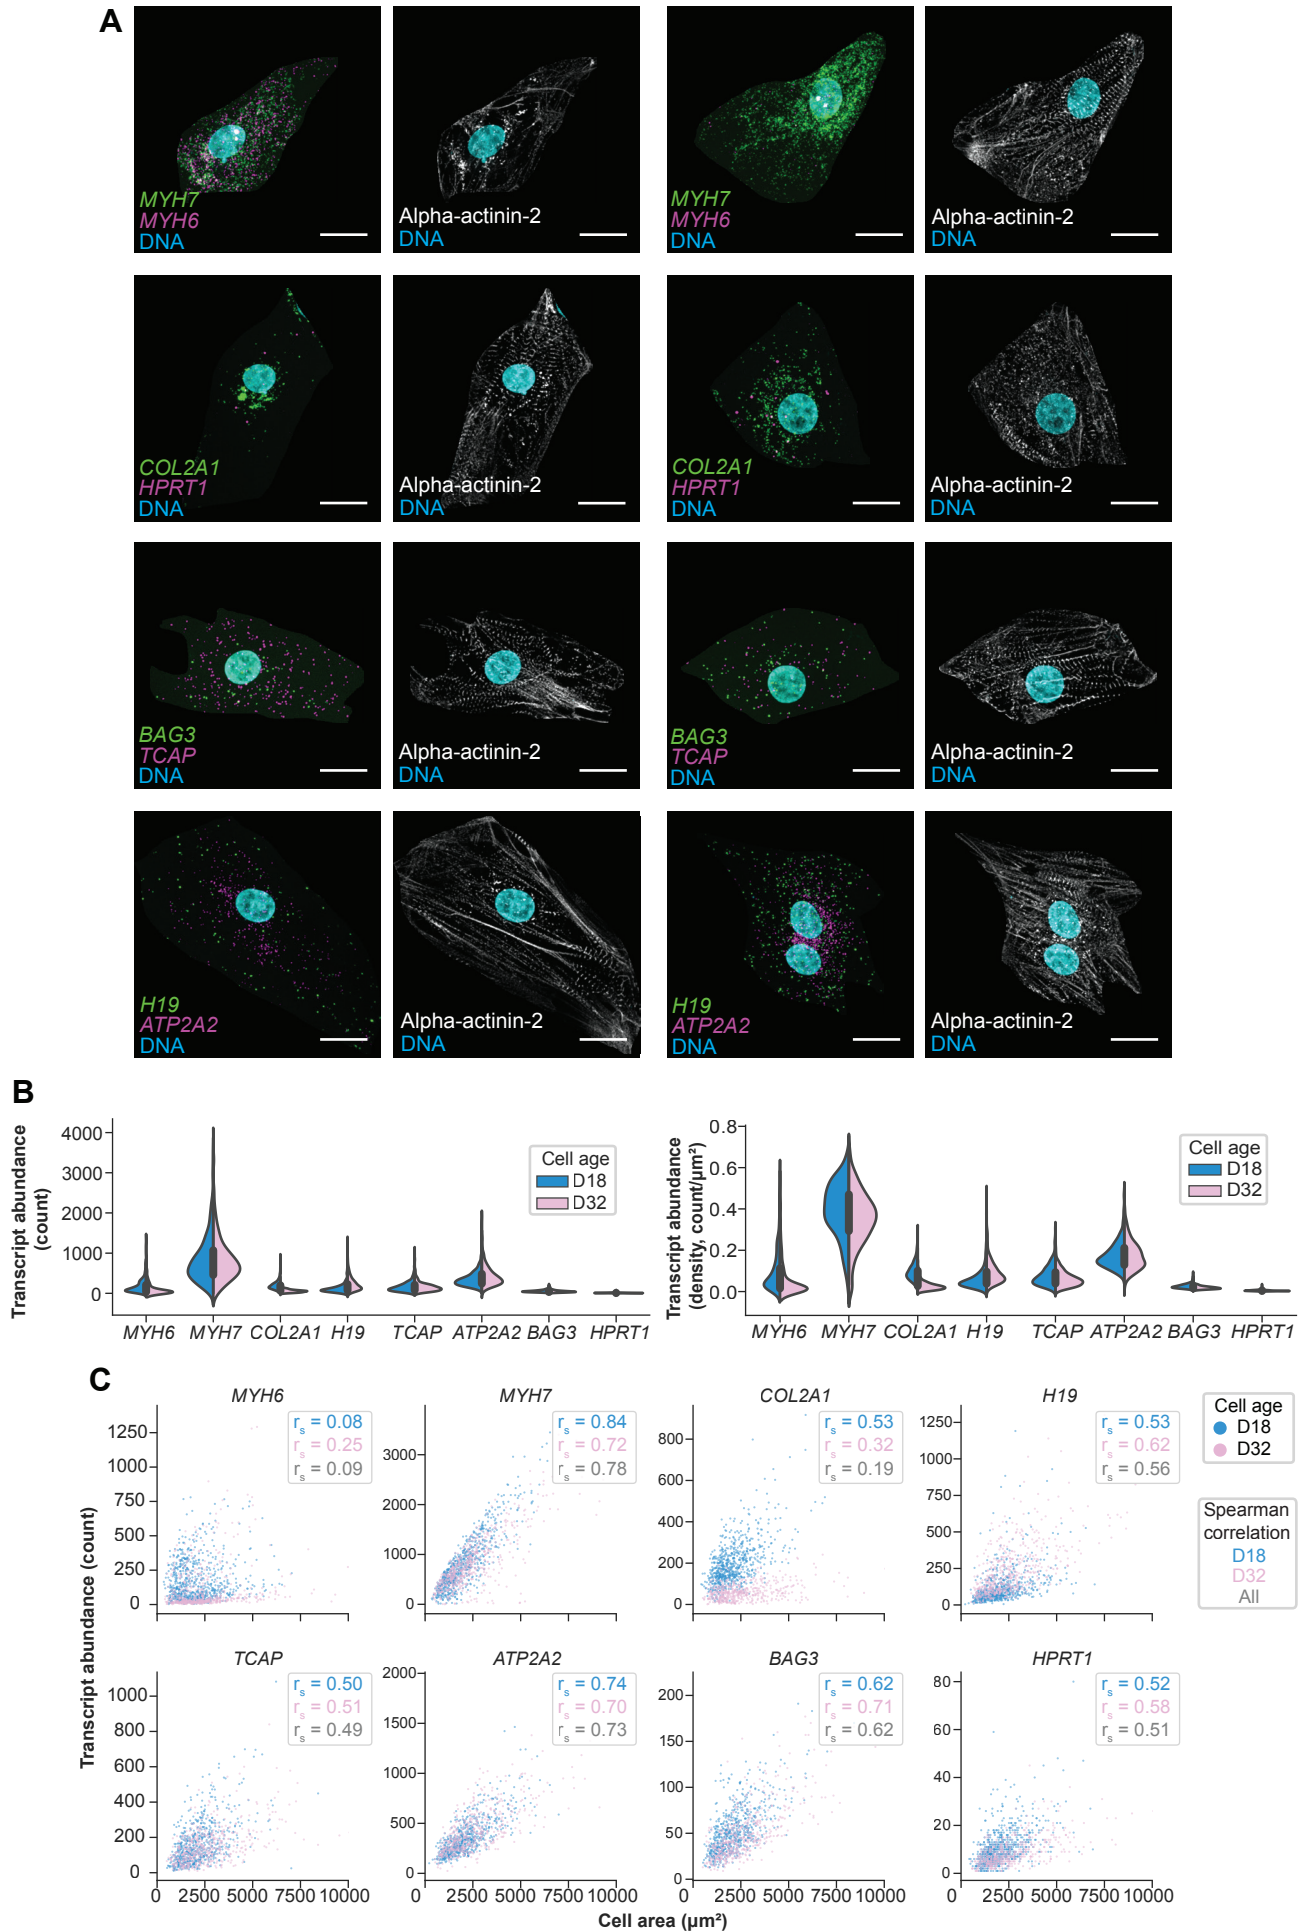

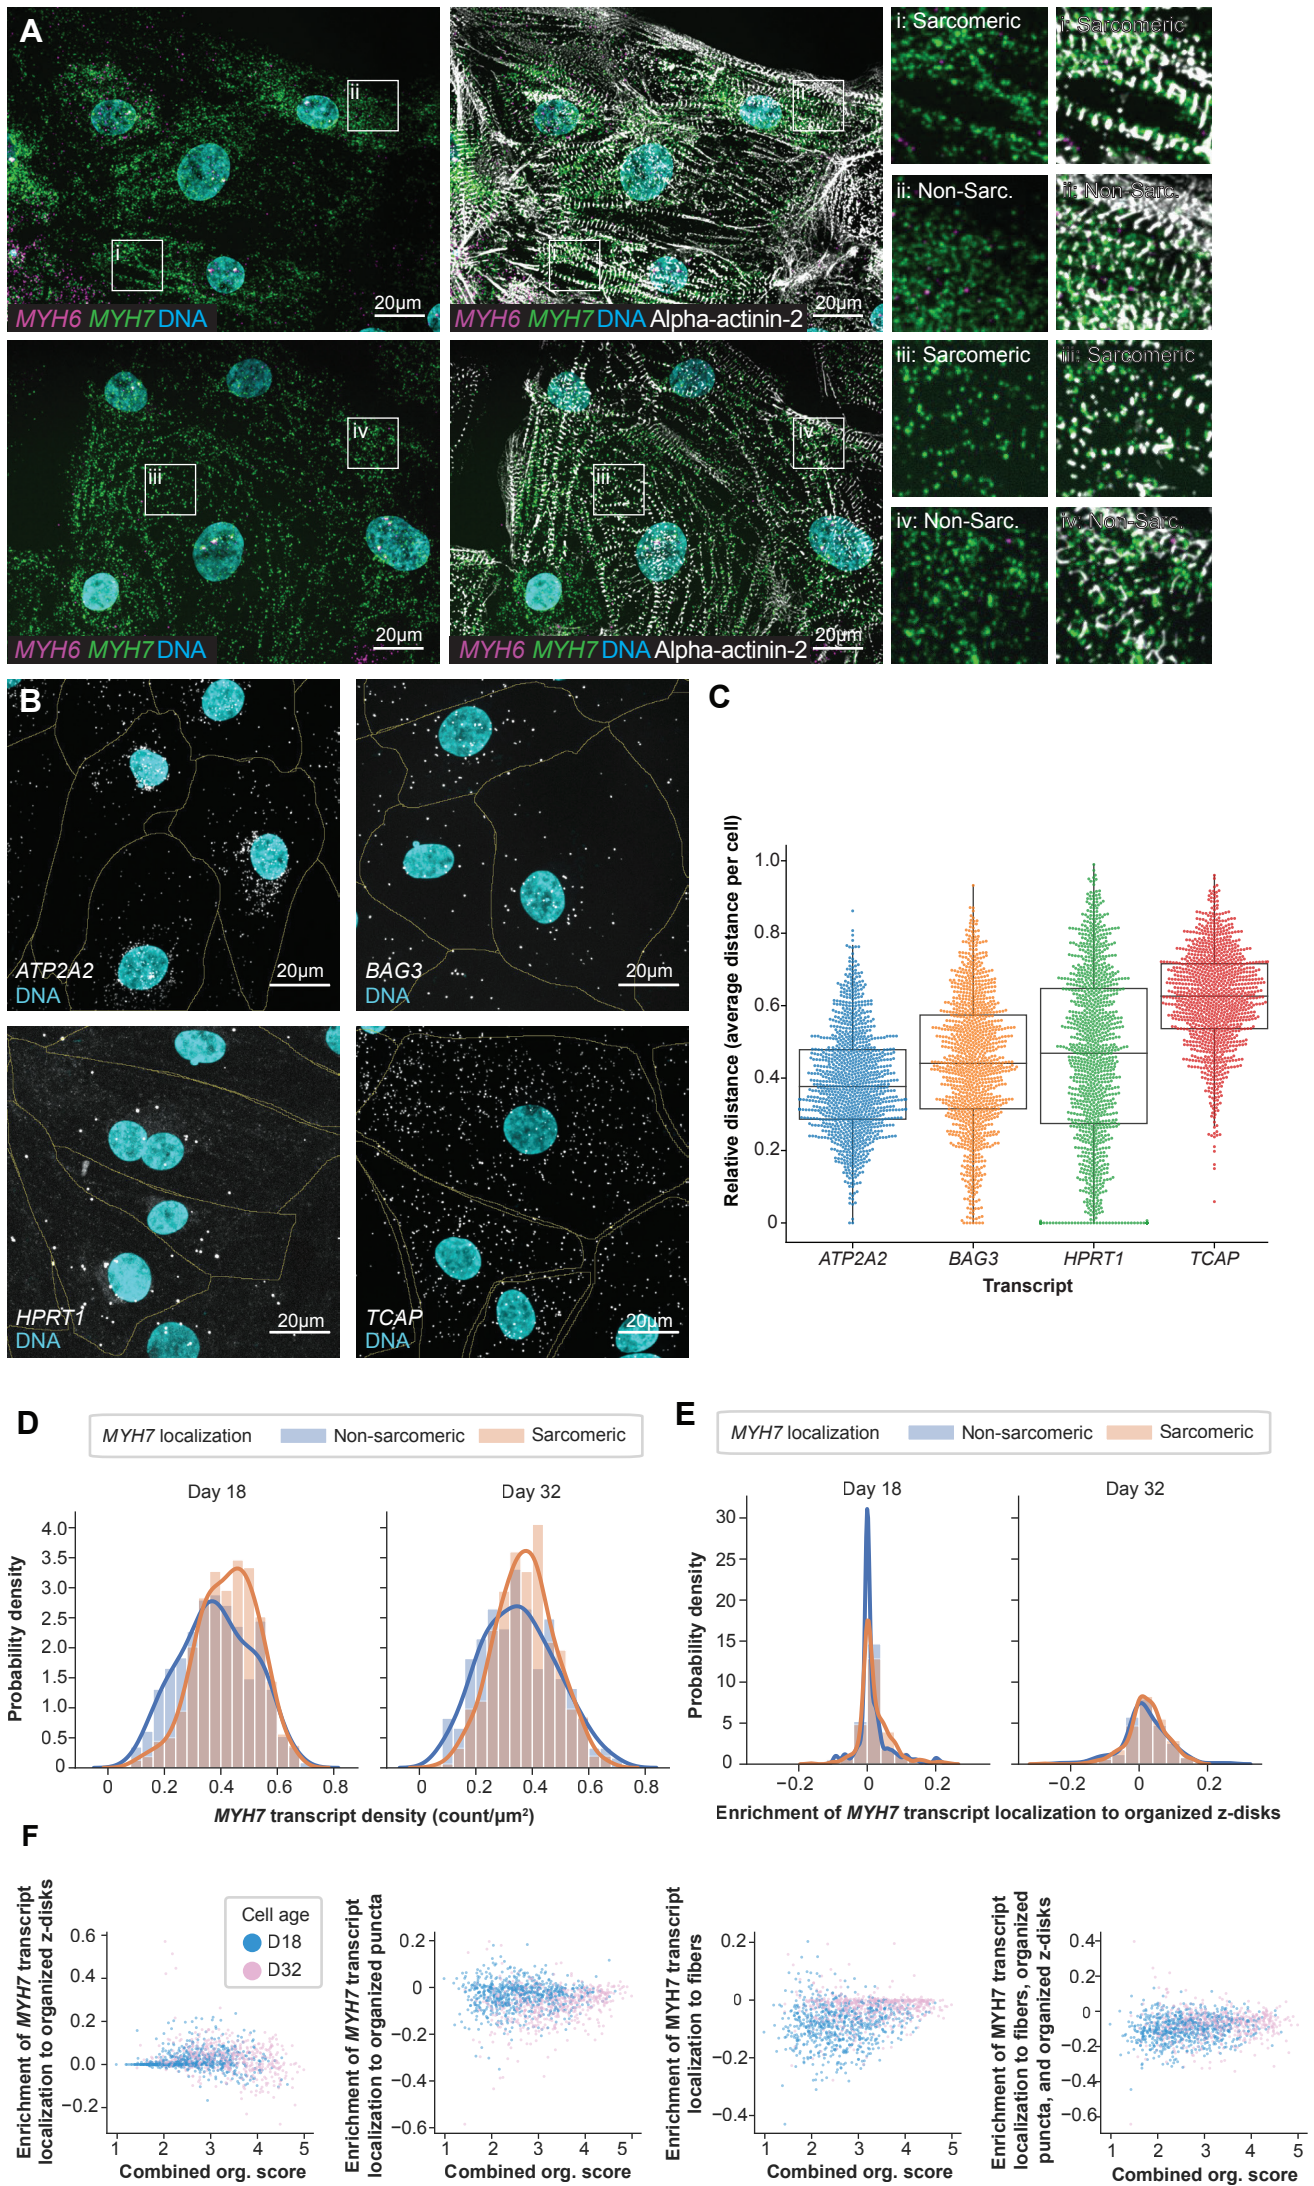

Supplement: Supplementary file [file media-6.pdf]
